# Supplementary material for: Illicit trade in marine fish catch and its effects on ecosystems and people worldwide
Source: PubMed Central journal article supplement — Sci Adv. 2020 Feb 26;6(9):eaaz3801. doi: 10.1126/sciadv.aaz3801 (PMC7043925; doi:10.1126/sciadv.aaz3801), 2020-02-26
Supplement: aaz3801_SM.pdf [file aaz3801_SM.pdf]

## Supplementary Materials for

### **Illicit trade in marine fish catch and its effects on ecosystems and people worldwide**

U. R. Sumaila\*, D. Zeller, L. Hood, M. L. D. Palomares, Y. Li, D. Pauly

\*Corresponding author. Email: [r.sumaila@oceans.ubc.ca](mailto:r.sumaila@oceans.ubc.ca)

Published 26 February 2020, *Sci. Adv.* **6**, eaaz3801 (2020)  
DOI: [10.1126/sciadv.aaz3801](https://doi.org/10.1126/sciadv.aaz3801)

#### **This PDF file includes:**

- Table S1. Catch, the economic and income multipliers.
- Table S2. Corporate tax rate and revenue by country.
- Table S3. Economic losses.

## Supplementary Materials (“Illicit Trade in Marine Fish Catch”)

**Table S1. Catch, the economic and income multipliers.** The administrative countries included in each geographic region, the average annual total landed commercial catch, the economic and income multipliers from Dyck and Sumaila (39), and the average annual catch and revenue loss to likely illicit trade for each of the two scenarios.

| Geographic Region                                   | Administrative Country (including overseas territories) | Total Catch (t x 10 <sup>3</sup> year <sup>-1</sup> ) | Economic Multiplier | Income Multiplier | Scenario 1                                 |                                                                          | Scenario 2                                 |                                                                          |
|-----------------------------------------------------|---------------------------------------------------------|-------------------------------------------------------|---------------------|-------------------|--------------------------------------------|--------------------------------------------------------------------------|--------------------------------------------|--------------------------------------------------------------------------|
|                                                     |                                                         |                                                       |                     |                   | Average catch loss (t-year <sup>-1</sup> ) | Average gross revenue loss (US\$ x 10 <sup>3</sup> ·year <sup>-1</sup> ) | Average catch loss (t-year <sup>-1</sup> ) | Average gross revenue loss (US\$ x 10 <sup>3</sup> ·year <sup>-1</sup> ) |
| Africa                                              | Algeria                                                 | 223                                                   | 1.19                | 0.25              | 31,969 - 52,427                            | 107,783 - 176,428                                                        | 19,200 - 39,658                            | 68,032 - 136,676                                                         |
|                                                     | Angola                                                  | 5,615                                                 | 3.54                | 0.73              | 111,136 - 178,351                          | 120,398 - 194,021                                                        | 105,802 - 173,017                          | 106,558 - 180,181                                                        |
|                                                     | Benin                                                   | 55                                                    | 1.52                | 0.32              | 13,929 - 23,052                            | 15,855 - 26,103                                                          | 6,263 - 15,387                             | 8,510 - 18,758                                                           |
|                                                     | Cameroon                                                | 141                                                   | 2.96                | 0.76              | 18,697 - 30,779                            | 25,831 - 42,920                                                          | 10,060 - 22,142                            | 9,923 - 27,012                                                           |
|                                                     | Cape Verde                                              | 18                                                    | 1.52                | 0.32              | 1,552 - 2,492                              | 3,135 - 5,039                                                            | 1,457 - 2,398                              | 2,898 - 4,802                                                            |
|                                                     | Comoros                                                 | 11                                                    | 2.95                | 0.72              | 1,441 - 2,401                              | 2,568 - 4,279                                                            | 480 - 1,441                                | 856 - 2,568                                                              |
|                                                     | Congo (ex - Zaire)                                      | 18                                                    | 3.53                | 0.73              | 5,513 - 8,952                              | 6,253 - 10,384                                                           | 4,205 - 7,644                              | 2,469 - 6,599                                                            |
|                                                     | Congo, R. of                                            | 71                                                    | 2.96                | 0.76              | 18,227 - 29,202                            | 8,594 - 13,779                                                           | 17,839 - 28,814                            | 8,298 - 13,484                                                           |
|                                                     | Côte d'Ivoire                                           | 122                                                   | 1.52                | 0.32              | 30,363 - 48,852                            | 25,048 - 40,430                                                          | 27,648 - 46,137                            | 21,521 - 36,903                                                          |
|                                                     | Djibouti                                                | 4                                                     | 3.00                | 0.71              | 683 - 1,101                                | 1,527 - 2,461                                                            | 604 - 1,022                                | 1,346 - 2,280                                                            |
|                                                     | Egypt                                                   | 119                                                   | 2.42                | 0.73              | 14,142 - 22,686                            | 16,939 - 27,240                                                          | 13,558 - 22,102                            | 15,556 - 25,858                                                          |
|                                                     | Equatorial Guinea                                       | 35                                                    | 2.97                | 0.77              | 11,309 - 18,136                            | 24,688 - 39,686                                                          | 10,888 - 17,715                            | 22,836 - 37,834                                                          |
|                                                     | Eritrea                                                 | 13                                                    | 2.95                | 0.72              | 740 - 1,234                                | 1,026 - 1,710                                                            | 247 - 740                                  | 342 - 1,026                                                              |
|                                                     | France                                                  | 19                                                    | 4.11                | 1.13              | 15,157 - 24,941                            | 61,257 - 100,832                                                         | 8,259 - 18,043                             | 33,045 - 72,620                                                          |
|                                                     | Gabon                                                   | 190                                                   | 2.96                | 0.76              | 30,336 - 48,870                            | 36,087 - 58,337                                                          | 27,006 - 45,540                            | 30,108 - 52,358                                                          |
|                                                     | Gambia                                                  | 186                                                   | 1.52                | 0.32              | 32,294 - 52,283                            | 38,308 - 61,764                                                          | 26,164 - 46,153                            | 33,600 - 57,056                                                          |
|                                                     | Ghana                                                   | 298                                                   | 1.52                | 0.32              | 24,335 - 39,956                            | 25,311 - 41,546                                                          | 14,136 - 29,757                            | 14,837 - 31,071                                                          |
|                                                     | Guinea                                                  | 634                                                   | 1.52                | 0.32              | 214,941 - 345,261                          | 379,531 - 608,627                                                        | 201,381 - 331,701                          | 365,766 - 594,861                                                        |
|                                                     | Guinea-Bissau                                           | 364                                                   | 1.52                | 0.32              | 134,372 - 215,232                          | 188,951 - 302,688                                                        | 132,004 - 212,864                          | 185,297 - 299,033                                                        |
|                                                     | Kenya                                                   | 11                                                    | 2.95                | 0.72              | 1,830 - 3,010                              | 4,880 - 8,023                                                            | 1,022 - 2,201                              | 2,728 - 5,872                                                            |
|                                                     | Liberia                                                 | 79                                                    | 1.52                | 0.32              | 28,529 - 45,853                            | 40,947 - 65,699                                                          | 26,465 - 43,789                            | 39,117 - 63,868                                                          |
|                                                     | Libya                                                   | 75                                                    | 1.19                | 0.25              | 10,300 - 17,055                            | 25,461 - 42,080                                                          | 4,550 - 11,305                             | 12,044 - 28,663                                                          |
|                                                     | Madagascar                                              | 93                                                    | 2.34                | 0.77              | 7,382 - 12,178                             | 13,838 - 22,938                                                          | 3,713 - 8,509                              | 5,865 - 14,965                                                           |
|                                                     | Mauritania                                              | 1,707                                                 | 1.52                | 0.32              | 412,283 - 660,273                          | 654,107 - 1,047,247                                                      | 406,088 - 654,078                          | 647,339 - 1,040,479                                                      |
|                                                     | Mauritius                                               | 15                                                    | 1.62                | 0.5               | 769 - 1,255                                | 2,602 - 4,225                                                            | 527 - 1,013                                | 1,973 - 3,597                                                            |
|                                                     | Morocco                                                 | 2,555                                                 | 2.81                | 0.91              | 628,814 - 1,008,609                        | 1,011,360 - 1,629,027                                                    | 603,739 - 983,535                          | 902,848 - 1,520,515                                                      |
|                                                     | Mozambique                                              | 55                                                    | 1.83                | 0.74              | 1,651 - 2,752                              | 3,121 - 5,201                                                            | 550 - 1,651                                | 1,040 - 3,121                                                            |
|                                                     | Namibia                                                 | 542                                                   | 4.82                | 0.87              | 43,434 - 69,495                            | 22,135 - 35,416                                                          | 43,434 - 69,495                            | 22,135 - 35,416                                                          |
|                                                     | Nigeria                                                 | 483                                                   | 0.28                | 0.05              | 54,209 - 88,760                            | 114,826 - 188,472                                                        | 33,956 - 68,507                            | 67,321 - 140,967                                                         |
|                                                     | Sao Tome and Principe                                   | 11                                                    | 2.96                | 0.77              | 951 - 1,540                                | 2,518 - 4,058                                                            | 769 - 1,358                                | 2,236 - 3,775                                                            |
|                                                     | Senegal                                                 | 704                                                   | 2.21                | 0.84              | 128,119 - 207,753                          | 192,420 - 310,741                                                        | 100,490 - 180,125                          | 163,724 - 282,045                                                        |
|                                                     | Seychelles                                              | 12                                                    | 2.95                | 0.72              | 198 - 330                                  | 291 - 485                                                                | 66 - 198                                   | 97 - 291                                                                 |
|                                                     | Sierra Leone                                            | 281                                                   | 1.52                | 0.32              | 34,769 - 57,154                            | 29,503 - 48,030                                                          | 19,523 - 41,908                            | 21,249 - 39,776                                                          |
| Somalia                                             | 219                                                     | 2.95                                                  | 0.72                | 73,201 - 117,191  | 121,316 - 194,183                          | 72,501 - 116,492                                                         | 120,536 - 193,403                          |                                                                          |
| South Africa                                        | 627                                                     | 3.13                                                  | 0.66                | 2,284 - 3,802     | 15,003 - 24,975                            | 813 - 2,330                                                              | 5,295 - 15,267                             |                                                                          |
| Spain                                               | 26                                                      | 3.86                                                  | 1                   | 29,288 - 47,182   | 98,456 - 158,874                           | 26,074 - 43,968                                                          | 85,007 - 145,425                           |                                                                          |
| Tanzania                                            | 97                                                      | 2.72                                                  | 1.1                 | 6,276 - 10,440    | 13,719 - 22,746                            | 2,296 - 6,460                                                            | 5,769 - 14,795                             |                                                                          |
| Togo                                                | 61                                                      | 1.52                                                  | 0.32                | 19,158 - 30,715   | 22,500 - 36,065                            | 18,530 - 30,087                                                          | 21,850 - 35,415                            |                                                                          |
| Tristan da Cunha Islands (UK)                       | 0.5                                                     | 4.26                                                  | 1.09                | 34 - 56           | 267 - 429                                  | 24 - 46                                                                  | 251 - 412                                  |                                                                          |
| Tunisia                                             | 99                                                      | 1.46                                                  | 0.28                | 337 - 539         | 501 - 801                                  | 337 - 539                                                                | 501 - 801                                  |                                                                          |
| United Kingdom (Ascension and Saint Helena Islands) | 0.5                                                     | 4.26                                                  | 1.09                | 11,502 - 18,523   | 19,124 - 31,109                            | 10,296 - 17,318                                                          | 14,026 - 26,010                            |                                                                          |

**Table S1. Catch, the economic and income multipliers.** The administrative countries included in each geographic region, the average annual total landed commercial catch, the economic and income multipliers from Dyck and Sumaila (39), and the average annual catch and revenue loss to likely illicit trade for each of the two scenarios.

| Geographic Region         | Administrative Country (including overseas territories)         | Total Catch (t x 10 <sup>3</sup> year <sup>-1</sup> ) | Economic Multiplier | Income Multiplier | Scenario 1                                 |                                                                          | Scenario 2                                 |                                                                          |
|---------------------------|-----------------------------------------------------------------|-------------------------------------------------------|---------------------|-------------------|--------------------------------------------|--------------------------------------------------------------------------|--------------------------------------------|--------------------------------------------------------------------------|
|                           |                                                                 |                                                       |                     |                   | Average catch loss (t·year <sup>-1</sup> ) | Average gross revenue loss (US\$ x 10 <sup>3</sup> ·year <sup>-1</sup> ) | Average catch loss (t·year <sup>-1</sup> ) | Average gross revenue loss (US\$ x 10 <sup>3</sup> ·year <sup>-1</sup> ) |
| Antarctic & sub-Antarctic | France (St. Paul & Amsterdam Isl., Crozet Isl., Kerguelen Isl.) | 7.4                                                   | 4.11                | 1.13              | 15,157 - 24,941                            | 61,257 - 100,832                                                         | 8,259 - 18,043                             | 33,045 - 72,620                                                          |
|                           | Norway (Bouvet Isl.)                                            | 0.075                                                 | 3.36                | 0.87              | 10,307 - 16,589                            | 17,054 - 27,514                                                          | 9,327 - 15,609                             | 14,785 - 25,244                                                          |
|                           | South Africa (Prince Edward Isl.)                               | 1.8                                                   | 3.13                | 0.66              | 2,284 - 3,802                              | 15,003 - 24,975                                                          | 813 - 2,330                                | 5,295 - 15,267                                                           |
|                           | United Kingdom (South Georgia & Sandwich Isl.)                  | 41                                                    | 4.26                | 1.09              | 11,502 - 18,523                            | 19,124 - 31,109                                                          | 10,296 - 17,318                            | 14,026 - 26,010                                                          |
| Asia                      | Australia (Christmas Isl. and Cocos-Keeling Isl.)               | 0.042                                                 | 3.69                | 1.1               | 22 - 36                                    | 73 - 120                                                                 | 18 - 32                                    | 46 - 93                                                                  |
|                           | Bahrain                                                         | 44                                                    | 1.02                | 0.25              | 7,799 - 12,993                             | 30,816 - 51,341                                                          | 2,651 - 7,845                              | 10,459 - 30,985                                                          |
|                           | Bangladesh                                                      | 679                                                   | 2.97                | 0.88              | 46,794 - 76,622                            | 36,374 - 59,308                                                          | 29,284 - 59,112                            | 25,276 - 48,210                                                          |
|                           | Brunei Darussalam                                               | 18                                                    | 2.16                | 0.62              | 5,218 - 8,591                              | 7,944 - 13,114                                                           | 2,799 - 6,172                              | 3,905 - 9,075                                                            |
|                           | Cambodia                                                        | 877                                                   | 1.73                | 0.54              | 368,060 - 589,145                          | 287,568 - 460,442                                                        | 365,579 - 586,663                          | 284,234 - 457,108                                                        |
|                           | China                                                           | 9,591                                                 | 3.34                | 0.79              | 291,307 - 470,167                          | 667,154 - 1,084,321                                                      | 250,552 - 429,412                          | 498,400 - 915,568                                                        |
|                           | Georgia                                                         | 141                                                   | 2.04                | 0.53              | 51,565 - 82,559                            | 22,794 - 36,526                                                          | 51,015 - 82,009                            | 22,245 - 35,976                                                          |
|                           | India                                                           | 2,845                                                 | 1.36                | 0.53              | 173,554 - 283,070                          | 234,161 - 381,403                                                        | 119,729 - 229,244                          | 166,711 - 313,953                                                        |
|                           | Indonesia                                                       | 7,210                                                 | 1.66                | 0.52              | 1,055,950 - 1,690,137                      | 915,916 - 1,466,482                                                      | 1,049,787 - 1,683,974                      | 905,753 - 1,456,319                                                      |
|                           | Iran                                                            | 319                                                   | 1.94                | 0.14              | 36,384 - 58,741                            | 72,127 - 116,147                                                         | 31,119 - 53,476                            | 64,695 - 108,714                                                         |
|                           | Iraq                                                            | 6                                                     | 1.03                | 0.25              | 4 - 6                                      | 3 - 5                                                                    | 1 - 4                                      | 1 - 3                                                                    |
|                           | Israel                                                          | 8                                                     | 1.03                | 0.25              | 697 - 1,162                                | 1,727 - 2,878                                                            | 232 - 697                                  | 576 - 1,727                                                              |
|                           | Japan                                                           | 4,163                                                 | 2.75                | 0.86              | 27,378 - 43,983                            | 58,826 - 95,491                                                          | 25,594 - 42,199                            | 45,135 - 81,800                                                          |
|                           | Jordan                                                          | 0.2                                                   | 2.67                | 0.71              | -                                          | 0                                                                        | 0                                          | 0                                                                        |
|                           | Korea (North)                                                   | 115                                                   | 3.04                | 0.71              | 6,143.71 - 10,119.05                       | 4,905 - 8,082                                                            | 3,252.55 - 7,227.89                        | 2,571 - 5,748                                                            |
|                           | Korea (South)                                                   | 3,285                                                 | 2.91                | 0.62              | 3,476 - 5,793                              | 4,525 - 7,542                                                            | 1,159 - 3,476                              | 1,508 - 4,525                                                            |
|                           | Kuwait                                                          | 6                                                     | 1.02                | 0.25              | 702 - 1,134                                | 1,230 - 1,985                                                            | 605 - 1,036                                | 1,051 - 1,806                                                            |
|                           | Lebanon                                                         | 6                                                     | 1.02                | 0.25              | 650 - 1,083                                | 1,223 - 2,038                                                            | 217 - 650                                  | 408 - 1,223                                                              |
|                           | Malaysia                                                        | 3,057                                                 | 2.58                | 0.7               | 801,184 - 1,286,553                        | 940,233 - 1,513,760                                                      | 754,594 - 1,239,963                        | 846,349 - 1,419,877                                                      |
|                           | Maldives                                                        | 40                                                    | 2.97                | 0.77              | 5,691 - 9,263                              | 9,100 - 14,896                                                           | 4,124 - 7,695                              | 5,749 - 11,544                                                           |
|                           | Myanmar                                                         | 1,605                                                 | 0.85                | 0.32              | 200,844 - 321,350                          | 269,230 - 430,768                                                        | 200,844 - 321,350                          | 269,230 - 430,768                                                        |
|                           | Oman                                                            | 187                                                   | 1.02                | 0.25              | 5,511 - 9,185                              | 12,958 - 21,596                                                          | 1,837 - 5,511                              | 4,319 - 12,958                                                           |
|                           | Pakistan                                                        | 664                                                   | 2.16                | 0.58              | 125,245 - 204,199                          | 81,657 - 132,528                                                         | 87,167 - 166,122                           | 62,886 - 113,757                                                         |
|                           | Philippines                                                     | 1,860                                                 | 1.19                | 0.34              | 376,509 - 611,252                          | 399,790 - 654,206                                                        | 288,124 - 522,867                          | 254,370 - 508,786                                                        |
|                           | Qatar                                                           | 34                                                    | 1.02                | 0.25              | 1,672 - 2,777                              | 2,713 - 4,511                                                            | 660 - 1,765                                | 1,011 - 2,809                                                            |
|                           | Saudi Arabia                                                    | 91                                                    | 1.02                | 0.25              | 3,261 - 5,371                              | 10,666 - 17,641                                                          | 1,728 - 3,838                              | 4,909 - 11,884                                                           |
|                           | Sri Lanka                                                       | 425                                                   | 1.01                | 0.32              | 688 - 1,147                                | 2,537 - 4,229                                                            | 229 - 688                                  | 846 - 2,537                                                              |
|                           | Syria                                                           | 6                                                     | 1.02                | 0.25              | 935 - 1,533                                | 2,165 - 3,535                                                            | 569 - 1,167                                | 1,447 - 2,818                                                            |
|                           | Taiwan                                                          | 311                                                   | 3.28                | 0.97              | 44,906 - 72,271                            | 61,864 - 99,552                                                          | 40,691 - 68,057                            | 56,168 - 93,856                                                          |
|                           | Thailand                                                        | 1,685                                                 | 2.12                | 0.24              | 128,957 - 214,929                          | 190,354 - 317,256                                                        | 42,986 - 128,957                           | 63,451 - 190,354                                                         |
|                           | Turkey                                                          | 639                                                   | 1.59                | 0.51              | 90,503 - 145,719                           | 107,638 - 174,437                                                        | 81,364 - 136,580                           | 85,467 - 152,266                                                         |
|                           | United Arab Emirates                                            | 74                                                    | 1.02                | 0.25              | 8,449 - 14,082                             | 25,020 - 41,699                                                          | 2,816 - 8,449                              | 8,340 - 25,020                                                           |
|                           | United Kingdom (Chagos Archipelago)                             | 29                                                    | 4.26                | 1.09              | 11,502 - 18,523                            | 19,124 - 31,109                                                          | 10,296 - 17,318                            | 14,026 - 26,010                                                          |

**Table S1. Catch, the economic and income multipliers.** The administrative countries included in each geographic region, the average annual total landed commercial catch, the economic and income multipliers from Dyck and Sumaila (39), and the average annual catch and revenue loss to likely illicit trade for each of the two scenarios.

| Geographic Region    | Administrative Country (including overseas territories)                                             | Total Catch (t x 10 <sup>3</sup> year <sup>-1</sup> ) | Economic Multiplier | Income Multiplier | Scenario 1                                 |                                                                          | Scenario 2                                 |                                                                          |
|----------------------|-----------------------------------------------------------------------------------------------------|-------------------------------------------------------|---------------------|-------------------|--------------------------------------------|--------------------------------------------------------------------------|--------------------------------------------|--------------------------------------------------------------------------|
|                      |                                                                                                     |                                                       |                     |                   | Average catch loss (t·year <sup>-1</sup> ) | Average gross revenue loss (US\$ x 10 <sup>3</sup> ·year <sup>-1</sup> ) | Average catch loss (t·year <sup>-1</sup> ) | Average gross revenue loss (US\$ x 10 <sup>3</sup> ·year <sup>-1</sup> ) |
|                      | Viet Nam                                                                                            | 2,456                                                 | 3.47                | 0.77              | 189,949 - 307,147                          | 180,138 - 292,332                                                        | 157,654 - 274,852                          | 139,030 - 251,224                                                        |
|                      | Yemen                                                                                               | 348                                                   | 1.02                | 0.25              | 55,492 - 92,485                            | 45,538 - 75,895                                                          | 18,517 - 55,510                            | 15,194 - 45,551                                                          |
| <b>Europe</b>        | Belgium                                                                                             | 4                                                     | 6.22                | 1.57              | 127 - 204                                  | 856 - 1,369                                                              | 127 - 204                                  | 856 - 1,369                                                              |
|                      | Bosnia and Herzegovina                                                                              | 0.01                                                  | 3.12                | 0.76              | 0.9 - 1.6                                  | 1.2 - 2.                                                                 | 0.3 - 0.9                                  | 0.4 - 1.2                                                                |
|                      | Bulgaria                                                                                            | 18                                                    | 18.34               | 0.69              | 5,062 - 8,102                              | 6,620 - 10,608                                                           | 5,027 - 8,068                              | 6,456 - 10,444                                                           |
|                      | Croatia                                                                                             | 64                                                    | 3.27                | 0.78              | 7,436 - 11,959                             | 6,042 - 9,722                                                            | 6,826 - 11,348                             | 5,487 - 9,168                                                            |
|                      | Cyprus                                                                                              | 2                                                     | 3.12                | 0.76              | 157 - 258                                  | 1,090 - 1,802                                                            | 86 - 188                                   | 508 - 1,221                                                              |
|                      | Denmark                                                                                             | 798                                                   | 3.72                | 1.04              | 9,289 - 14,915                             | 11,358 - 18,222                                                          | 8,766 - 14,392                             | 10,862 - 17,726                                                          |
|                      | Estonia                                                                                             | 74                                                    | 3.81                | 0.51              | 3,595 - 5,765                              | 1,299 - 2,083                                                            | 3,456 - 5,627                              | 1,252 - 2,036                                                            |
|                      | Finland                                                                                             | 101                                                   | 1.56                | 0.43              | 4,280 - 6,866                              | 1,301 - 2,086                                                            | 4,097 - 6,683                              | 1,254 - 2,039                                                            |
|                      | France                                                                                              | 319                                                   | 4.11                | 1.13              | 15,157 - 24,941                            | 61,257 - 100,832                                                         | 8,259 - 18,043                             | 33,045 - 72,620                                                          |
|                      | Germany                                                                                             | 146                                                   | 3.28                | 0.9               | 3,968 - 6,354                              | 4,592 - 7,351                                                            | 3,921 - 6,307                              | 4,547 - 7,306                                                            |
|                      | Iceland                                                                                             | 1,122                                                 | 2.49                | 0.51              | .02 - .03                                  | .03 - .05                                                                | -                                          | 0.03 - 0.05                                                              |
|                      | Ireland                                                                                             | 567                                                   | 2.15                | 0.38              | 3,676 - 5,907                              | 7,550 - 12,173                                                           | 3,430 - 5,660                              | 6,621 - 11,244                                                           |
|                      | Italy                                                                                               | 313                                                   | 1.75                | 0.51              | 39,283 - 63,021                            | 218,276 - 350,550                                                        | 37,604 - 61,342                            | 205,195 - 337,468                                                        |
|                      | Latvia                                                                                              | 89                                                    | 4.31                | 1.11              | 5,970 - 9,571                              | 3,585 - 5,748                                                            | 5,787 - 9,388                              | 3,462 - 5,625                                                            |
|                      | Lithuania                                                                                           | 25                                                    | 3.79                | 0.63              | 2,871 - 4,598                              | 2,580 - 4,132                                                            | 2,829 - 4,556                              | 2,532 - 4,085                                                            |
|                      | Montenegro                                                                                          | 0.9                                                   | 3.12                | 0.76              | 83 - 133                                   | 92 - 147                                                                 | 76 - 127                                   | 83 - 139                                                                 |
|                      | Netherlands                                                                                         | 104                                                   | 2.95                | 0.68              | 1,383 - 2,219                              | 4,138 - 6,661                                                            | 1,324 - 2,160                              | 3,724 - 6,248                                                            |
|                      | Norway                                                                                              | 2,618                                                 | 3.36                | 0.87              | 10,307 - 16,589                            | 17,054 - 27,514                                                          | 9,327 - 15,609                             | 14,785 - 25,244                                                          |
|                      | Poland                                                                                              | 121                                                   | 4.27                | 0.75              | 16,772 - 26,972                            | 14,792 - 23,779                                                          | 15,399 - 25,600                            | 13,685 - 22,671                                                          |
|                      | Portugal                                                                                            | 183                                                   | 4.78                | 1.52              | 3,534 - 5,729                              | 9,127 - 14,804                                                           | 2,786 - 4,981                              | 7,110 - 12,788                                                           |
|                      | Romania                                                                                             | 1.1                                                   | 3.73                | 0.87              | 67 - 107                                   | 571 - 913                                                                | 67 - 107                                   | 571 - 913                                                                |
|                      | Russia                                                                                              | 361                                                   | 2.50                | 0.5               | 48,899 - 78,383                            | 59,607 - 95,591                                                          | 47,460 - 76,943                            | 57,415 - 93,398                                                          |
|                      | Russian Federation                                                                                  | 5,236                                                 | 2.50                | 0.5               | 714,113 - 1,151,761                        | 573,131 - 924,169                                                        | 622,307 - 1,059,955                        | 501,545 - 852,582                                                        |
|                      | Spain                                                                                               | 366                                                   | 3.86                | 1                 | 29,288 - 47,182                            | 98,456 - 158,874                                                         | 26,074 - 43,968                            | 85,007 - 145,425                                                         |
|                      | Sweden                                                                                              | 272                                                   | 2.66                | 0.68              | 20,930 - 33,515                            | 15,446 - 24,730                                                          | 20,669 - 33,254                            | 15,292 - 24,576                                                          |
|                      | Ukraine                                                                                             | 78                                                    | 5.56                | 1.05              | 6,995 - 11,271                             | 4,044 - 6,534                                                            | 6,203 - 10,480                             | 3,412 - 5,901                                                            |
|                      | United Kingdom                                                                                      | 1,444                                                 | 4.26                | 1.09              | 11,502 - 18,523                            | 19,124 - 31,109                                                          | 10,296 - 17,318                            | 14,026 - 26,010                                                          |
| <b>North America</b> | Antigua and Barbuda                                                                                 | 3                                                     | 1.22                | 0.28              | 38 - 63                                    | 381 - 636                                                                | 13 - 38                                    | 127 - 381                                                                |
|                      | Bahamas                                                                                             | 14                                                    | 1.22                | 0.28              | 460 - 747                                  | 2,699 - 4,352                                                            | 354 - 641                                  | 2,367 - 4,020                                                            |
|                      | Barbados                                                                                            | 4                                                     | 1.21                | 0.29              | 397 - 661                                  | 457 - 762                                                                | 132 - 397                                  | 152 - 457                                                                |
|                      | Belize                                                                                              | 5                                                     | 3.46                | 0.78              | 505 - 842                                  | 874 - 1,457                                                              | 168 - 505                                  | 291 - 874                                                                |
|                      | Canada                                                                                              | 999                                                   | 3.30                | 1.07              | 34,542 - 55,360                            | 73,029 - 117,065                                                         | 33,611 - 54,429                            | 70,837 - 114,873                                                         |
|                      | Costa Rica                                                                                          | 46                                                    | 2.16                | 0.52              | 1,071 - 1,717                              | 1,761 - 2,821                                                            | 1,037 - 1,683                              | 1,732 - 2,792                                                            |
|                      | Cuba                                                                                                | 24                                                    | 1.22                | 0.28              | 1,082 - 1,803                              | 2,727 - 4,545                                                            | 361 - 1,082                                | 909 - 2,727                                                              |
|                      | Denmark (Greenland)                                                                                 | 275                                                   | 3.72                | 1.04              | 9,289 - 14,915                             | 11,358 - 18,222                                                          | 8,766 - 14,392                             | 10,862 - 17,726                                                          |
|                      | Dominica                                                                                            | 0.8                                                   | 1.22                | 0.29              | 55 - 92                                    | 135 - 225                                                                | 18 - 55                                    | 45 - 135                                                                 |
|                      | Dominican Republic                                                                                  | 25                                                    | 1.21                | 0.28              | 3,799 - 6,332                              | 7,532 - 12,554                                                           | 1,266 - 3,799                              | 2,511 - 7,532                                                            |
|                      | El Salvador                                                                                         | 26                                                    | 3.46                | 0.78              | 3,807 - 6,169                              | 3,385 - 5,490                                                            | 3,019 - 5,382                              | 2,641 - 4,746                                                            |
|                      | France (Clipperton Isl., Guadeloupe, Martinique, Saint Pierre & Miquelon, St Barthelemy, St Martin) | 28                                                    | 4.11                | 1.13              | 15,157 - 24,941                            | 61,257 - 100,832                                                         | 8,259 - 18,043                             | 33,045 - 72,620                                                          |

**Table S1. Catch, the economic and income multipliers.** The administrative countries included in each geographic region, the average annual total landed commercial catch, the economic and income multipliers from Dyck and Sumaila (39), and the average annual catch and revenue loss to likely illicit trade for each of the two scenarios.

| Geographic Region    | Administrative Country (including overseas territories)                                               | Total Catch (t x 10 <sup>3</sup> year <sup>-1</sup> ) | Economic Multiplier | Income Multiplier | Scenario 1                                 |                                                                          | Scenario 2                                 |                                                                          |
|----------------------|-------------------------------------------------------------------------------------------------------|-------------------------------------------------------|---------------------|-------------------|--------------------------------------------|--------------------------------------------------------------------------|--------------------------------------------|--------------------------------------------------------------------------|
|                      |                                                                                                       |                                                       |                     |                   | Average catch loss (t·year <sup>-1</sup> ) | Average gross revenue loss (US\$ x 10 <sup>3</sup> ·year <sup>-1</sup> ) | Average catch loss (t·year <sup>-1</sup> ) | Average gross revenue loss (US\$ x 10 <sup>3</sup> ·year <sup>-1</sup> ) |
|                      | Grenada                                                                                               | 2                                                     | 1.21                | 0.28              | 216 - 360                                  | 396 - 660                                                                | 72 - 216                                   | 132 - 396                                                                |
|                      | Guatemala                                                                                             | 37                                                    | 1.87                | 0.52              | 12,556 - 20,596                            | 17,277 - 28,293                                                          | 7,491 - 15,531                             | 10,775 - 21,791                                                          |
|                      | Haiti                                                                                                 | 20                                                    | 2.12                | 0.45              | 727 - 1,210                                | 1,408 - 2,342                                                            | 268 - 751                                  | 513 - 1,447                                                              |
|                      | Honduras                                                                                              | 15                                                    | 1.22                | 0.28              | 1,529 - 2,519                              | 2,858 - 4,699                                                            | 804 - 1,794                                | 1,605 - 3,445                                                            |
|                      | Jamaica                                                                                               | 16                                                    | 3.46                | 0.78              | 55 - 92                                    | 81 - 134                                                                 | 18 - 55                                    | 27 - 81                                                                  |
|                      | Mexico                                                                                                | 1,775                                                 | 1.21                | 0.28              | 131,977 - 218,021                          | 204,704 - 338,406                                                        | 63,401 - 149,445                           | 95,916 - 229,617                                                         |
|                      | Netherlands (Aruba, Bonaire, Curacao, Saba and Sint Eustatius, Sint Maarten)                          | 5                                                     | 2.95                | 0.68              | 1,383 - 2,219                              | 4,138 - 6,661                                                            | 1,324 - 2,160                              | 3,724 - 6,248                                                            |
|                      | Nicaragua                                                                                             | 26                                                    | 1.50                | 0.41              | 2,390 - 3,824                              | 4,674 - 7,479                                                            | 2,390 - 3,824                              | 4,674 - 7,479                                                            |
|                      | Panama                                                                                                | 123                                                   | 2.56                | 0.91              | 5,013 - 8,105                              | 6,659 - 10,839                                                           | 4,168 - 7,260                              | 4,812 - 8,992                                                            |
|                      | Saint Kitts and Nevis                                                                                 | 1.1                                                   | 1.22                | 0.28              | 210 - 350                                  | 1,099 - 1,832                                                            | 70 - 210                                   | 366 - 1,099                                                              |
|                      | Saint Vincent & the Grenadines                                                                        | 2                                                     | 1.22                | 0.28              | 38 - 60                                    | 95 - 152                                                                 | 38 - 60                                    | 95 - 152                                                                 |
|                      | Trinidad and Tobago                                                                                   | 16                                                    | 1.22                | 0.28              | 1,504 - 2,408                              | 4,675 - 7,483                                                            | 1,489 - 2,393                              | 4,643 - 7,451                                                            |
|                      | United Kingdom (Anguilla, Bermuda, British Virgin Isl., Cayman Isl., Montserrat, Turks & Caicos Isl.) | 14                                                    | 4.26                | 1.09              | 11,502 - 18,523                            | 19,124 - 31,109                                                          | 10,296 - 17,318                            | 14,026 - 26,010                                                          |
|                      | USA                                                                                                   | 5,017                                                 | 3.10                | 1.29              | 134,345 - 216,461                          | 433,696 - 702,010                                                        | 119,253 - 201,369                          | 352,740 - 621,053                                                        |
| <b>Oceania</b>       | Australia                                                                                             | 172                                                   | 3.69                | 1.1               | 22 - 36                                    | 73 - 120                                                                 | 18 - 32                                    | 46 - 93                                                                  |
|                      | Fiji                                                                                                  | 22                                                    | 3.34                | 0.65              | 112 - 184                                  | 376 - 624                                                                | 54 - 127                                   | 150 - 398                                                                |
|                      | France (French Polynesia, New Caledonia, Wallis & Futuna Isl.)                                        | 24                                                    | 4.11                | 1.13              | 15,157 - 24,941                            | 61,257 - 100,832                                                         | 8,259 - 18,043                             | 33,045 - 72,620                                                          |
|                      | Kiribati                                                                                              | 264                                                   | 3.34                | 0.65              | 353 - 588                                  | 570 - 950                                                                | 118 - 353                                  | 190 - 570                                                                |
|                      | Marshall Islands                                                                                      | 36                                                    | 3.34                | 0.65              | -                                          | 0                                                                        | 0                                          | 0                                                                        |
|                      | Micronesia                                                                                            | 171                                                   | 3.34                | 0.65              | -                                          | 0                                                                        | 0                                          | 0                                                                        |
|                      | New Zealand                                                                                           | 609                                                   | 2.58                | 0.65              | 27,812 - 44,683                            | 56,736 - 91,217                                                          | 25,966 - 42,837                            | 52,337 - 86,818                                                          |
|                      | Papua New Guinea                                                                                      | 377                                                   | 3.34                | 0.65              | 2,681 - 4,371                              | 1,973 - 3,223                                                            | 1,867 - 3,557                              | 1,300 - 2,551                                                            |
|                      | Samoa                                                                                                 | 7                                                     | 3.34                | 0.65              | 79 - 132                                   | 131 - 218                                                                | 26 - 79                                    | 44 - 131                                                                 |
|                      | Solomon Islands                                                                                       | 140                                                   | 3.34                | 0.65              | 34 - 57                                    | 54 - 90                                                                  | 11 - 34                                    | 18 - 54                                                                  |
|                      | Timor Leste                                                                                           | 3                                                     | 3.27                | 0.73              | -                                          | 0                                                                        | 0                                          | 0                                                                        |
|                      | Tonga                                                                                                 | 7                                                     | 3.34                | 0.65              | 33 - 55                                    | 59 - 99                                                                  | 11 - 33                                    | 20 - 59                                                                  |
|                      | Tuvalu                                                                                                | 37                                                    | 3.34                | 0.65              | 21 - 36                                    | 20 - 33                                                                  | 7 - 21                                     | 7 - 20                                                                   |
|                      | USA (American Samoa, Hawaii Main Islands, Northern Marianas, Wake Isl.)                               | 0.01                                                  | 3.10                | 1.29              | 134,345 - 216,461                          | 433,696 - 702,010                                                        | 119,253 - 201,369                          | 352,740 - 621,053                                                        |
|                      | Vanuatu                                                                                               | 23                                                    | 3.34                | 0.65              | 9 - 15                                     | 26 - 43                                                                  | 3 - 9                                      | 9 - 26                                                                   |
| <b>South America</b> | Argentina                                                                                             | 1,208                                                 | 2.97                | 0.85              | 133,336 - 213,338                          | 123,797 - 198,076                                                        | 133,336 - 213,338                          | 123,797 - 198,076                                                        |
|                      | Brazil                                                                                                | 638                                                   | 2.39                | 0.81              | 11,888 - 19,434                            | 28,905 - 47,460                                                          | 7,759 - 15,305                             | 16,784 - 35,340                                                          |
|                      | Chile                                                                                                 | 3,440                                                 | 2.44                | 0.55              | 310,963 - 500,890                          | 159,412 - 260,144                                                        | 277,473 - 467,400                          | 108,560 - 209,292                                                        |
|                      | Colombia                                                                                              | 51                                                    | 3.14                | 1.43              | 2,103 - 3,366                              | 3,248 - 5,196                                                            | 2,103 - 3,366                              | 3,248 - 5,196                                                            |
|                      | Ecuador                                                                                               | 439                                                   | 3.25                | 0.67              | 39,658 - 64,795                            | 43,121 - 70,970                                                          | 26,238 - 51,375                            | 23,362 - 51,210                                                          |
|                      | France                                                                                                | 11                                                    | 4.11                | 1.13              | 15,157 - 24,941                            | 61,257 - 100,832                                                         | 8,259 - 18,043                             | 33,045 - 72,620                                                          |
|                      | Guyana                                                                                                | 53                                                    | 2.12                | 0.45              | 2,128 - 3,547                              | 3,137 - 5,228                                                            | 709 - 2,128                                | 1,046 - 3,137                                                            |

**Table S1. Catch, the economic and income multipliers.** The administrative countries included in each geographic region, the average annual total landed commercial catch, the economic and income multipliers from Dyck and Sumaila (39), and the average annual catch and revenue loss to likely illicit trade for each of the two scenarios.

| Geographic Region | Administrative Country (including overseas territories) | Total Catch (t x 10 <sup>3</sup> year <sup>-1</sup> ) | Economic Multiplier | Income Multiplier | Scenario 1                                 |                                                                          | Scenario 2                                 |                                                                          |
|-------------------|---------------------------------------------------------|-------------------------------------------------------|---------------------|-------------------|--------------------------------------------|--------------------------------------------------------------------------|--------------------------------------------|--------------------------------------------------------------------------|
|                   |                                                         |                                                       |                     |                   | Average catch loss (t·year <sup>-1</sup> ) | Average gross revenue loss (US\$ x 10 <sup>3</sup> ·year <sup>-1</sup> ) | Average catch loss (t·year <sup>-1</sup> ) | Average gross revenue loss (US\$ x 10 <sup>3</sup> ·year <sup>-1</sup> ) |
|                   | Peru                                                    | 8,404                                                 | 2.95                | 0.82              | 576,195 - 925,222                          | 261,874 - 426,719                                                        | 543,092 - 892,119                          | 184,674 - 349,518                                                        |
|                   | Suriname                                                | 52                                                    | 2.12                | 0.45              | 4,760 - 7,902                              | 8,181 - 13,521                                                           | 1,905 - 5,046                              | 3,870 - 9,210                                                            |
|                   | United Kingdom (Falkland Isl.)                          | 571                                                   | 4.26                | 1.09              | 11,502 - 18,523                            | 19,124 - 31,109                                                          | 10,296 - 17,318                            | 14,026, 26,010                                                           |
|                   | Uruguay                                                 | 123                                                   | 2.63                | 0.63              | 8,776 - 14,627                             | 10,992 - 18,320                                                          | 2,925 - 8,776                              | 3,664 - 10,992                                                           |
|                   | Venezuela                                               | 223                                                   | 1.06                | 0.44              | 14,048 - 23,414                            | 35,685 - 59,475                                                          | 4,683 - 14,048                             | 11,895 - 35,685                                                          |

**Table S2. Corporate tax rate and revenue by country.** The administrative countries included in each geographic region, the corporate tax rate for the country from (56), and the average annual tax revenue loss to likely illicit trade for each of the two scenarios. Where a country's tax rate was not available the average tax rate for that region was used.

| Geographic Region                                   | Administrative Country (including overseas territories)         | Tax rate (%)    | Scenario 1                                                     | Scenario 2                                                     |
|-----------------------------------------------------|-----------------------------------------------------------------|-----------------|----------------------------------------------------------------|----------------------------------------------------------------|
|                                                     |                                                                 |                 | Tax revenue loss (US\$ x 10 <sup>3</sup> ·year <sup>-1</sup> ) | Tax revenue loss (US\$ x 10 <sup>3</sup> ·year <sup>-1</sup> ) |
| Africa                                              | Algeria                                                         | 26              | 28,024 - 45,871                                                | 17,688 - 35,536                                                |
|                                                     | Angola                                                          | 30              | 36,119 - 58,206                                                | 31,967 - 54,054                                                |
|                                                     | Benin                                                           | 30              | 4,757 - 7,831                                                  | 2,553 - 5,627                                                  |
|                                                     | Cameroon                                                        | 33              | 8,524 - 14,164                                                 | 3,275 - 8,914                                                  |
|                                                     | Cape Verde                                                      | 28.24           | 885 - 1,423                                                    | 818 - 1,356                                                    |
|                                                     | Comoros                                                         | 28.24           | 725 - 1,209                                                    | 242 - 725                                                      |
|                                                     | Congo (ex - Zaire)                                              | 35              | 2,189 - 3,634                                                  | 864 - 2,310                                                    |
|                                                     | Congo, R. of                                                    | 28.24           | 2,427 - 3,891                                                  | 2,343 - 3,808                                                  |
|                                                     | Côte d'Ivoire                                                   | 25              | 6,262 - 10,107                                                 | 5,380 - 9,226                                                  |
|                                                     | Djibouti                                                        | 25              | 382 - 615                                                      | 337 - 570                                                      |
|                                                     | Egypt                                                           | 23              | 3,896 - 6,265                                                  | 3,578 - 5,947                                                  |
|                                                     | Equatorial Guinea                                               | 28.24           | 6,972 - 11,207                                                 | 6,449 - 10,684                                                 |
|                                                     | Eritrea                                                         | 28.24           | 290 - 483                                                      | 97 - 290                                                       |
|                                                     | France                                                          | 33              | 20,215 - 33,275                                                | 10,905 - 23,965                                                |
|                                                     | Gabon                                                           | 30              | 10,826 - 17,501                                                | 9,032 - 15,707                                                 |
|                                                     | Gambia                                                          | 31              | 11,875 - 19,147                                                | 10,416 - 17,687                                                |
|                                                     | Ghana                                                           | 25              | 6,328 - 10,386                                                 | 3,709 - 7,768                                                  |
|                                                     | Guinea                                                          | 28.24           | 107,180 - 171,876                                              | 103,292 - 167,989                                              |
|                                                     | Guinea-Bissau                                                   | 28.24           | 53,360 - 85,479                                                | 52,328 - 84,447                                                |
|                                                     | Kenya                                                           | 30              | 1,464 - 2,407                                                  | 819 - 1,761                                                    |
|                                                     | Liberia                                                         | 28.24           | 11,564 - 18,553                                                | 11,047 - 18,036                                                |
|                                                     | Libya                                                           | 20              | 5,092 - 8,416                                                  | 2,409 - 5,733                                                  |
|                                                     | Madagascar                                                      | 20              | 2,768 - 4,588                                                  | 1,173 - 2,993                                                  |
|                                                     | Mauritania                                                      | 28.24           | 184,720 - 295,743                                              | 182,808 - 293,831                                              |
|                                                     | Mauritius                                                       | 15              | 390 - 634                                                      | 296 - 539                                                      |
|                                                     | Morocco                                                         | 31              | 313,522 - 504,998                                              | 279,883 - 471,360                                              |
|                                                     | Mozambique                                                      | 32              | 999 - 1,664                                                    | 333 - 999                                                      |
|                                                     | Namibia                                                         | 32              | 7,083 - 11,333                                                 | 7,083 - 11,333                                                 |
|                                                     | Nigeria                                                         | 30              | 34,448 - 56,542                                                | 20,196 - 42,290                                                |
|                                                     | Sao Tome and Principe                                           | 28.24           | 711 - 1,146                                                    | 631 - 1,066                                                    |
|                                                     | Senegal                                                         | 30              | 57,726 - 93,222                                                | 49,117 - 84,614                                                |
|                                                     | Seychelles                                                      | 28.24           | 82 - 137                                                       | 27 - 82                                                        |
| Sierra Leone                                        | 30                                                              | 8,851 - 14,409  | 6,375 - 11,933                                                 |                                                                |
| Somalia                                             | 28.24                                                           | 34,260 - 54,837 | 34,039 - 54,617                                                |                                                                |
| South Africa                                        | 28                                                              | 4,201 - 6,993   | 1,483 - 4,275                                                  |                                                                |
| Spain                                               | 25                                                              | 24,614 - 39,718 | 21,252 - 36,356                                                |                                                                |
| Tanzania                                            | 30                                                              | 4,116 - 6,824   | 1,731 - 4,439                                                  |                                                                |
| Togo                                                | 28.24                                                           | 6,354 - 10,185  | 6,170 - 10,001                                                 |                                                                |
| Tristan da Cunha Islands (UK)                       | 28.24                                                           | 75 - 121        | 71 - 116                                                       |                                                                |
| Tunisia                                             | 25                                                              | 125 - 200       | 125 - 200                                                      |                                                                |
| United Kingdom (Ascension and Saint Helena Islands) | 19                                                              | 3,634 - 5,911   | 2,665 - 4,942                                                  |                                                                |
| Antarctic & sub-Antarctic                           | France (St. Paul & Amsterdam Isl., Crozet Isl., Kerguelen Isl.) | 33              | 20,215 - 33,275                                                | 10,905 - 23,965                                                |
|                                                     | Norway (Bouvet Isl.)                                            | 23              | 3,923 - 6,328                                                  | 3,401 - 5,806                                                  |
|                                                     | South Africa (Prince Edward Isl.)                               | 28              | 4,201 - 6,993                                                  | 1,483 - 4,275                                                  |

**Table S2. Corporate tax rate and revenue by country.** The administrative countries included in each geographic region, the corporate tax rate for the country from (56), and the average annual tax revenue loss to likely illicit trade for each of the two scenarios. Where a country's tax rate was not available the average tax rate for that region was used.

| Geographic Region | Administrative Country (including overseas territories) | Tax rate (%) | Scenario 1                                                     | Scenario 2                                                     |
|-------------------|---------------------------------------------------------|--------------|----------------------------------------------------------------|----------------------------------------------------------------|
|                   |                                                         |              | Tax revenue loss (US\$ x 10 <sup>3</sup> ·year <sup>-1</sup> ) | Tax revenue loss (US\$ x 10 <sup>3</sup> ·year <sup>-1</sup> ) |
|                   | United Kingdom (South Georgia & Sandwich Isl.)          | 19           | 3,634 - 5,911                                                  | 2,665 - 4,942                                                  |
| <b>Asia</b>       | Australia (Christmas Isl. and Cocos-Keeling Isl.)       | 30           | 22 - 36                                                        | 14 - 28                                                        |
|                   | Bahrain                                                 | 0            | -                                                              | -                                                              |
|                   | Bangladesh                                              | 25           | 9,093 - 14,827                                                 | 6,319 - 12,052                                                 |
|                   | Brunei Darussalam                                       | 18.5         | 1,470 - 2,426                                                  | 722 - 1,679                                                    |
|                   | Cambodia                                                | 20           | 57,514 - 92,088                                                | 56,847 - 91,422                                                |
|                   | China                                                   | 25           | 166,788 - 271,080                                              | 124,600 - 228,892                                              |
|                   | Georgia                                                 | 15           | 3,419 - 5,479                                                  | 3,337 - 5,396                                                  |
|                   | India                                                   | 35           | 81,956 - 133,491                                               | 58,349 - 109,883                                               |
|                   | Indonesia                                               | 25           | 228,979 - 366,621                                              | 226,438 - 364,080                                              |
|                   | Iran                                                    | 19.35        | 13,957 - 22,474                                                | 12,518 - 21,036                                                |
|                   | Iraq                                                    | 15           | 0.49 - 0.82                                                    | 0.16 - 0.49                                                    |
|                   | Israel                                                  | 23           | 397 - 662                                                      | 132 - 397                                                      |
|                   | Japan                                                   | 30.86        | 18,154 - 29,469                                                | 13,929 - 25,243                                                |
|                   | Jordan                                                  | 20           | 0                                                              | 0                                                              |
|                   | Korea (North)                                           | 21.09        | 1,035 - 1,704                                                  | 542 - 1,212                                                    |
|                   | Korea (South)                                           | 25           | 1,131 - 1,885                                                  | 377 - 1,131                                                    |
|                   | Kuwait                                                  | 15           | 184 - 298                                                      | 158 - 271                                                      |
|                   | Lebanon                                                 | 15           | 183 - 306                                                      | 61 - 183                                                       |
|                   | Malaysia                                                | 24           | 225,656 - 363,303                                              | 203,124 - 340,770                                              |
|                   | Maldives                                                | 21.09        | 1,919 - 3,142                                                  | 1,212 - 2,435                                                  |
|                   | Myanmar                                                 | 25           | 67,308 - 107,692                                               | 67,308 - 107,692                                               |
|                   | Oman                                                    | 15           | 1,944 - 3,239                                                  | 648 - 1,944                                                    |
|                   | Pakistan                                                | 30           | 24,497 - 39,758                                                | 18,866 - 34,127                                                |
|                   | Philippines                                             | 30           | 119,937 - 196,262                                              | 76,311 - 152,636                                               |
|                   | Qatar                                                   | 10           | 271 - 451                                                      | 101 - 281                                                      |
|                   | Saudi Arabia                                            | 20           | 2,133 - 3,528                                                  | 982 - 2,377                                                    |
|                   | Sri Lanka                                               | 28           | 710 - 1,184                                                    | 237 - 710                                                      |
|                   | Syria                                                   | 28           | 606 - 990                                                      | 405 - 789                                                      |
|                   | Taiwan                                                  | 20           | 12,373 - 19,910                                                | 11,234 - 18,771                                                |
|                   | Thailand                                                | 20           | 38,071 - 63,451                                                | 12,690 - 38,071                                                |
|                   | Turkey                                                  | 22           | 23,680 - 38,376                                                | 18,803 - 33,499                                                |
|                   | United Arab Emirates                                    | 55           | 13,761 - 22,935                                                | 4,587 - 13,761                                                 |
|                   | United Kingdom (Chagos Archipelago)                     | 19           | 3,634 - 5,911                                                  | 2,665 - 4,942                                                  |
|                   | Viet Nam                                                | 20           | 36,028 - 58,466                                                | 27,806 - 50,245                                                |
|                   | Yemen                                                   | 20           | 9,108 - 15,179                                                 | 3,039 - 9,110                                                  |
| <b>Europe</b>     | Belgium                                                 | 29           | 248 - 397                                                      | 248 - 397                                                      |
|                   | Bosnia and Herzegovina                                  | 10           | 0.12 - 0.2                                                     | 0.04 - 0.12                                                    |
|                   | Bulgaria                                                | 10           | 662 - 1,061                                                    | 646 - 1,044                                                    |
|                   | Croatia                                                 | 20           | 1,208 - 1,944                                                  | 1,097 - 1,834                                                  |
|                   | Cyprus                                                  | 12.5         | 136 - 225                                                      | 64 - 153                                                       |
|                   | Denmark                                                 | 22           | 2,499 - 4,009                                                  | 2,390 - 3,900                                                  |
|                   | Estonia                                                 | 20           | 260 - 417                                                      | 250 - 407                                                      |
|                   | Finland                                                 | 20           | 260 - 417                                                      | 251 - 408                                                      |
|                   | France                                                  | 33           | 20,215 - 33,275                                                | 10,905 - 23,965                                                |
|                   | Germany                                                 | 30           | 1,377 - 2,205                                                  | 1,364 - 2,192                                                  |



**Table S2. Corporate tax rate and revenue by country.** The administrative countries included in each geographic region, the corporate tax rate for the country from (56), and the average annual tax revenue loss to likely illicit trade for each of the two scenarios. Where a country's tax rate was not available the average tax rate for that region was used.

| Geographic Region    | Administrative Country (including overseas territories)                                               | Tax rate (%) | Scenario 1                                                     | Scenario 2                                                     |
|----------------------|-------------------------------------------------------------------------------------------------------|--------------|----------------------------------------------------------------|----------------------------------------------------------------|
|                      |                                                                                                       |              | Tax revenue loss (US\$ x 10 <sup>3</sup> ·year <sup>-1</sup> ) | Tax revenue loss (US\$ x 10 <sup>3</sup> ·year <sup>-1</sup> ) |
|                      | Iceland                                                                                               | 20           | 0.01 - 0.01                                                    | 0.01 - 0.01                                                    |
|                      | Ireland                                                                                               | 12.5         | 944 - 1,522                                                    | 828 - 1,406                                                    |
|                      | Italy                                                                                                 | 24           | 52,386 - 84,132                                                | 49,247 - 80,992                                                |
|                      | Latvia                                                                                                | 20           | 717 - 1,150                                                    | 692 - 1,125                                                    |
|                      | Lithuania                                                                                             | 15           | 387 - 620                                                      | 380 - 613                                                      |
|                      | Montenegro                                                                                            | 9            | 8 - 13                                                         | 8 - 13                                                         |
|                      | Netherlands                                                                                           | 25           | 1,034 - 1,665                                                  | 931 - 1,562                                                    |
|                      | Norway                                                                                                | 23           | 3,923 - 6,328                                                  | 3,401 - 5,806                                                  |
|                      | Poland                                                                                                | 19           | 2,811 - 4,518                                                  | 2,600 - 4,307                                                  |
|                      | Portugal                                                                                              | 21           | 1,917 - 3,109                                                  | 1,493 - 2,685                                                  |
|                      | Romania                                                                                               | 16           | 91 - 146                                                       | 91 - 146                                                       |
|                      | Russia                                                                                                | 20           | 11,921 - 19,118                                                | 11,483 - 18,680                                                |
|                      | Russian Federation                                                                                    | 20           | 114,626 - 184,834                                              | 100,309 - 170,516                                              |
|                      | Spain                                                                                                 | 25           | 24,614 - 39,718                                                | 21,252 - 36,356                                                |
|                      | Sweden                                                                                                | 22           | 3,398 - 5,441                                                  | 3,364 - 5,407                                                  |
|                      | Ukraine                                                                                               | 18           | 728 - 1,176                                                    | 614 - 1,062                                                    |
|                      | United Kingdom                                                                                        | 19           | 3,634 - 5,911                                                  | 2,665 - 4,942                                                  |
| <b>North America</b> | Antigua and Barbuda                                                                                   | 25           | 95 - 159                                                       | 32 - 95                                                        |
|                      | Bahamas                                                                                               | 0            | -                                                              | -                                                              |
|                      | Barbados                                                                                              | 30           | 137 - 228                                                      | 46 - 137                                                       |
|                      | Belize                                                                                                | 26.75        | 234 - 390                                                      | 78 - 234                                                       |
|                      | Canada                                                                                                | 26.5         | 19,353 - 31,022                                                | 18,772 - 30,441                                                |
|                      | Costa Rica                                                                                            | 30           | 528 - 846                                                      | 520 - 838                                                      |
|                      | Cuba                                                                                                  | 26.75        | 729 - 1,216                                                    | 243 - 729                                                      |
|                      | Denmark (Greenland)                                                                                   | 22           | 2,499 - 4,009                                                  | 2,390 - 3,900                                                  |
|                      | Dominica                                                                                              | 25           | 34 - 56                                                        | 11 - 34                                                        |
|                      | Dominican Republic                                                                                    | 27           | 2,034 - 3,389                                                  | 678 - 2,034                                                    |
|                      | El Salvador                                                                                           | 30           | 1,015 - 1,647                                                  | 792 - 1,424                                                    |
|                      | France (Clipperton Isl., Guadeloupe, Martinique, Saint Pierre & Miquelon, St Barthelemy, St Martin)   | 33           | 20,215 - 33,275                                                | 10,905 - 23,965                                                |
|                      | Grenada                                                                                               | 30           | 119 - 198                                                      | 40 - 119                                                       |
|                      | Guatemala                                                                                             | 25           | 4,319 - 7,073                                                  | 2,694 - 5,448                                                  |
|                      | Haiti                                                                                                 | 26.75        | 377 - 627                                                      | 137 - 387                                                      |
|                      | Honduras                                                                                              | 25           | 715 - 1,175                                                    | 401 - 861                                                      |
|                      | Jamaica                                                                                               | 25           | 20 - 34                                                        | 7 - 20                                                         |
|                      | Mexico                                                                                                | 30           | 61,411 - 101,522                                               | 28,775 - 68,885                                                |
|                      | Netherlands (Aruba, Bonaire, Curacao, Saba and Sint Eustatius, Sint Maarten)                          | 25           | 1,034 - 1,665                                                  | 931 - 1,562                                                    |
|                      | Nicaragua                                                                                             | 30           | 1,402 - 2,244                                                  | 1,402 - 2,244                                                  |
|                      | Panama                                                                                                | 25           | 1,665 - 2,710                                                  | 1,203 - 2,248                                                  |
|                      | Saint Kitts and Nevis                                                                                 | 33           | 363 - 605                                                      | 121 - 363                                                      |
|                      | Saint Vincent & the Grenadines                                                                        | 33           | 31 - 50                                                        | 31 - 50                                                        |
|                      | Trinidad and Tobago                                                                                   | 25           | 1,169 - 1,871                                                  | 1,161 - 1,863                                                  |
|                      | United Kingdom (Anguilla, Bermuda, British Virgin Isl., Cayman Isl., Montserrat, Turks & Caicos Isl.) | 19           | 3,634 - 5,911                                                  | 2,665 - 4,942                                                  |
|                      | USA                                                                                                   | 27           | 117,098 - 189,543                                              | 95,240 - 167,684                                               |

**Table S2. Corporate tax rate and revenue by country.** The administrative countries included in each geographic region, the corporate tax rate for the country from (56), and the average annual tax revenue loss to likely illicit trade for each of the two scenarios. Where a country's tax rate was not available the average tax rate for that region was used.

| Geographic Region | Administrative Country (including overseas territories)                 | Tax rate (%) | Scenario 1                                                     | Scenario 2                                                     |
|-------------------|-------------------------------------------------------------------------|--------------|----------------------------------------------------------------|----------------------------------------------------------------|
|                   |                                                                         |              | Tax revenue loss (US\$ x 10 <sup>3</sup> ·year <sup>-1</sup> ) | Tax revenue loss (US\$ x 10 <sup>3</sup> ·year <sup>-1</sup> ) |
| Oceania           | Australia                                                               | 30           | 22 - 36                                                        | 14 - 28                                                        |
|                   | Fiji                                                                    | 20           | 75 - 125                                                       | 30 - 80                                                        |
|                   | France (French Polynesia, New Caledonia, Wallis & Futuna Isl.)          | 33           | 20,215 - 33,275                                                | 10,905 - 23,965                                                |
|                   | Kiribati                                                                | 28.43        | 162 - 270                                                      | 54 - 162                                                       |
|                   | Marshall Islands                                                        | 28.43        | 0                                                              | 0                                                              |
|                   | Micronesia                                                              | 28.43        | 0                                                              | 0                                                              |
|                   | New Zealand                                                             | 28           | 15,886 - 25,541                                                | 14,654 - 24,309                                                |
|                   | Papua New Guinea                                                        | 30           | 592 - 967                                                      | 390 - 765                                                      |
|                   | Samoa                                                                   | 27           | 35 - 59                                                        | 12 - 35                                                        |
|                   | Solomon Islands                                                         | 30           | 16 - 27                                                        | 5 - 16                                                         |
|                   | Timor Leste                                                             | 28.24        | 0                                                              | 0                                                              |
|                   | Tonga                                                                   | 28.43        | 17 - 28                                                        | 6 - 17                                                         |
|                   | Tuvalu                                                                  | 28.43        | 6 - 9                                                          | 2 - 6                                                          |
|                   | USA (American Samoa, Hawaii Main Islands, Northern Marianas, Wake Isl.) | 27           | 117,098 - 189,543                                              | 95,240 - 167,684                                               |
| Vanuatu           | 0                                                                       | -            | -                                                              |                                                                |
| South America     | Argentina                                                               | 30           | 37,139 - 59,423                                                | 37,139 - 59,423                                                |
|                   | Brazil                                                                  | 34           | 9,828 - 16,137                                                 | 5,707 - 12,015                                                 |
|                   | Chile                                                                   | 26           | 41,447 - 67,638                                                | 28,225 - 54,416                                                |
|                   | Colombia                                                                | 33           | 1,072 - 1,715                                                  | 1,072 - 1,715                                                  |
|                   | Ecuador                                                                 | 25           | 10,780 - 17,743                                                | 5,840 - 12,803                                                 |
|                   | France                                                                  | 33           | 20,215 - 33,275                                                | 10,905 - 23,965                                                |
|                   | Guyana                                                                  | 27.24        | 854 - 1,424                                                    | 285 - 854                                                      |
|                   | Peru                                                                    | 29.5         | 77,253 - 125,882                                               | 54,479 - 103,108                                               |
|                   | Suriname                                                                | 36           | 2,945 - 4,867                                                  | 1,393 - 3,315                                                  |
|                   | United Kingdom (Falkland Isl.)                                          | 19           | 3,634 - 5,911                                                  | 2,665 - 4,942                                                  |
|                   | Uruguay                                                                 | 25           | 2,748 - 4,580                                                  | 916 - 2,748                                                    |
|                   | Venezuela                                                               | 34           | 12,133 - 20,222                                                | 4,044 - 12,133                                                 |

**Table S3. Economic losses.** Estimated average annual economic losses to the legitimate (formal) international trading system due to likely illicit trade in marine fish catch over the last decade of total reconstructed catch data (2005-2014) for two scenarios of assumed fractions of unreported catches being redirected to illicit trade. Both scenarios assume 50-80% of unreported industrial landed catches are being redirected to illicit trade, while the fractions of artisanal unreported landed catches being redirected to illicit trade ranges from 30-50% and 10-30% for scenario 1 and 2, respectively. These estimates are compared with previous estimates of illegal fishing by Agnew and colleagues (3), the *Sea Around Us* total landed catch (reported and unreported landings) and total landed value of commercial fisheries averaged over the same time period, and the FAO total landed catch averaged over 2005 - 2014.

| FAO Area                       | Scenario 1                          |                                                    | Scenario 2                          |                                                    | Agnew <i>et al.</i> (2009)          |                                                    | <i>Sea Around Us</i>                     |                                              | FAO                                      |
|--------------------------------|-------------------------------------|----------------------------------------------------|-------------------------------------|----------------------------------------------------|-------------------------------------|----------------------------------------------------|------------------------------------------|----------------------------------------------|------------------------------------------|
|                                | Catch loss<br>(t x10 <sup>3</sup> ) | Gross revenue<br>loss<br>(US\$ x 10 <sup>6</sup> ) | Catch loss<br>(t x10 <sup>3</sup> ) | Gross revenue<br>loss<br>(US\$ x 10 <sup>6</sup> ) | Catch loss<br>(t x10 <sup>3</sup> ) | Gross<br>revenue loss<br>(US\$ x 10 <sup>6</sup> ) | Landed<br>catch<br>(t x10 <sup>3</sup> ) | Landed<br>value<br>(US\$ x 10 <sup>6</sup> ) | Landed<br>catch<br>(t x10 <sup>3</sup> ) |
| Arctic Sea                     | 0.2 - 0.4                           | 0.5 - 00.8                                         | 0.1 - 0.2                           | 0.2 - 0.5                                          | -                                   | -                                                  | 1                                        | 2                                            | 0.11                                     |
| Atlantic, Eastern<br>Central   | 1,838 - 2,956                       | 2,834 - 4,561                                      | 1,683 - 2,801                       | 2,564 - 4,291                                      | 294 - 562                           | 265 - 506                                          | 8,018                                    | 11,093                                       | 4,082                                    |
| Atlantic, Northeast            | 153 - 246                           | 222 - 357                                          | 143 - 236                           | 196 - 332                                          | 364 - 842                           | 328 - 758                                          | 8,593                                    | 13,468                                       | 8,655                                    |
| Atlantic, Northwest            | 91 - 147                            | 318 - 514                                          | 80 - 136                            | 263 - 459                                          | 22 - 82                             | 20 - 74                                            | 2,213                                    | 7,936                                        | 2,057                                    |
| Atlantic, Southeast            | 153 - 246                           | 149 - 240                                          | 149 - 241                           | 131 - 222                                          | 53 - 139                            | 48 - 125                                           | 1,698                                    | 2,106                                        | 1,426                                    |
| Atlantic, Southwest            | 154 - 247                           | 164 - 264                                          | 144 - 237                           | 144 - 244                                          | 228 - 674                           | 205 - 606                                          | 2,479                                    | 4,221                                        | 2,082                                    |
| Atlantic, Western<br>Central   | 132 - 216                           | 290 - 474                                          | 87 - 171                            | 188 - 372                                          | 22 - 59                             | 20 - 53                                            | 1,792                                    | 4,519                                        | 1,315                                    |
| Antarctic <sup>s</sup>         | 0.1 - 0.1                           | 0.5 - 0.7                                          | 0.1 - 0.1                           | 0.5 - 0.7                                          | 9.6 - 9.6                           | 9 - 9                                              | 114                                      | 241                                          | 185                                      |
| Indian Ocean, Eastern          | 739 - 1,191                         | 978 - 1,576                                        | 656 - 1,108                         | 863 - 1,461                                        | 468 - 971                           | 421 - 874                                          | 7,062                                    | 9,221                                        | 5,960                                    |
| Indian Ocean,<br>Western       | 435 - 710                           | 582 - 949                                          | 292 - 567                           | 404 - 771                                          | 229 - 560                           | 206 - 504                                          | 4,158                                    | 5,761                                        | 4,366                                    |
| Mediterranean and<br>Black Sea | 309 - 499                           | 644 - 1,044                                        | 268 - 458                           | 516 - 916                                          | -                                   | -                                                  | 2,243                                    | 5,276                                        | 1,422                                    |
| Pacific, Eastern<br>Central    | 119 - 197                           | 187 - 308                                          | 63 - 141                            | 95 - 216                                           | 130 - 278                           | 117 - 251                                          | 2,045                                    | 2,455                                        | 1,902                                    |
| Pacific, Northeast             | 17 - 28                             | 34 - 55                                            | 17 - 27                             | 34 - 54                                            | 2.3 - 8.4                           | 2 - 8                                              | 2,239                                    | 2,031                                        | 2,856                                    |
| Pacific, Northwest             | 1,091 - 1,761                       | 1,393 - 2,258                                      | 940 - 1,610                         | 1,109 - 1,974                                      | 1,326 - 3,506                       | 1,193 - 3,155                                      | 23,621                                   | 32,651                                       | 20,369                                   |
| Pacific, Southeast             | 929 - 1,494                         | 467 - 762                                          | 849 - 1,414                         | 319 - 614                                          | 1,198 - 2,568                       | 1,078 - 2,311                                      | 12,332                                   | 6,707                                        | 10,641                                   |
| Pacific, Southwest             | 28 - 45                             | 57 - 91                                            | 26 - 43                             | 52 - 87                                            | 5.2 - 33                            | 5 - 30                                             | 606                                      | 1,220                                        | 614                                      |
| Pacific, Western<br>Central    | 2,512 - 4,041                       | 2,341 - 3,778                                      | 2,297 - 3,826                       | 2,006 - 3,444                                      | 786 - 1,730                         | 707 - 1,557                                        | 14,964                                   | 18,658                                       | 11,494                                   |
| <b>Total</b>                   | <b>8,702 - 14,024</b>               | <b>10,659 - 17,232</b>                             | <b>7,696 - 13,018</b>               | <b>8,886 - 15,459</b>                              | <b>5,141 - 12,040</b>               | <b>4,627 - 10,836</b>                              | <b>94,177</b>                            | <b>127,566</b>                               | <b>79,427</b>                            |

<sup>s</sup> Includes Indian Ocean and Atlantic Antarctic FAO Area.
